# Supplementary material
Source: PubMed Central journal article supplement (PMC9017342)
Supplement: aac.02124-21-s0001.pdf [file aac.02124-21-s0001.pdf]

## Supplementary File

2

| Isolate*                                                   | CAZ   | CZA     | FEP   | PIP | PIP/TAZO | IMI   | IMI/REL | MEM  | MEM/VAB | ATM   |
|------------------------------------------------------------|-------|---------|-------|-----|----------|-------|---------|------|---------|-------|
| <i>E. coli</i> DH10B<br><i>bla</i> <sub>KPC-2</sub>        | 64    | ≤ 0.5/4 | 8     | 512 | 512/4    | 8     | 0.5/4   | 4    | 0.03/8  | 256   |
| <i>E. coli</i> DH10B<br><i>bla</i> <sub>KPC-2(D179Y)</sub> | 512   | 64/4    | 4     | 128 | 8/4      | 0.25  | 0.5/4   | 0.06 | 0.03/8  | 8     |
| <i>E. coli</i> DH10B<br><i>bla</i> <sub>KPC-3</sub>        | 512   | 2/4     | 16    | 512 | 512/4    | 4     | 0.5/4   | 4    | 0.03/8  | 512   |
| <i>E. coli</i> DH10B<br><i>bla</i> <sub>KPC-3(D179Y)</sub> | > 512 | 64/4    | 4     | 128 | 8/4      | 0.25  | 0.5/4   | 0.06 | 0.03/8  | 8     |
| <i>E. coli</i> DH10B                                       | ≤ 0.5 | ≤ 0.5/4 | ≤ 0.5 | 2   | 2/4      | 0.125 | 0.25/4  | 0.03 | 0.03/8  | ≤ 0.5 |

4 **Table S1. AST results of the study isolates.** Mueller-Hinton (MH) agar-dilution MICs (mg/L) were interpreted according to 2020  
 CLSI criteria for *Enterobacterales* as follows: for aztreonam (ATM) and ceftazidime (CAZ), MIC ≤ 4 is susceptible (S), MIC = 8 is  
 6 intermediate (I), and MIC ≥ 16 is resistant (R); for cefepime (FEP), MIC ≤ 2 is S, MIC = 4-8 is susceptible dose dependent (SDD),  
 and MIC ≥ 16 is R; for piperacillin (PIP), MIC ≤ 16 is S, MIC = 32-64 is I, and MIC ≥ 128 is R; for meropenem (MEM) and imipenem  
 8 (IMI), MIC ≤ 1 is S, MIC = 2 is I, and MIC ≥ 4 is R; for ceftazidime/avibactam (CZA), MIC ≤ 8/4 is S, and MIC ≥ 16/4 is R; for  
 piperacillin/tazobactam (PIP/TAZO), MIC ≤ 16/4 is S, MIC = 32/4-64/4 is I, and MIC ≥ 128/4 is R; for meropenem/vaborbactam  
 10 (MEM/VAB), MIC ≤ 4/8 is S, MIC = 8/8 is I, and MIC ≥ 16/8 is R. Imipenem/relebactam (IMI/REL) MICs were interpreted according to  
 FDA breakpoints: MIC ≤ 2/4 is S, MIC = 4/4 is I, and MIC ≥ 8/4 is R. Relebactam was tested at fixed concentration of 4 mg/L while  
 12 imipenem concentration was in doubling dilutions as a 1:1 mixture of imipenem:cilastatin. \*All KPC variants cloned into pBR322 and  
 transformed into *E. coli* DH10B cells. \*\*AVI/TAZO/MEM/REL are kept at 4µg/ml, VAB at 8µg/ml per CLSI criteria.

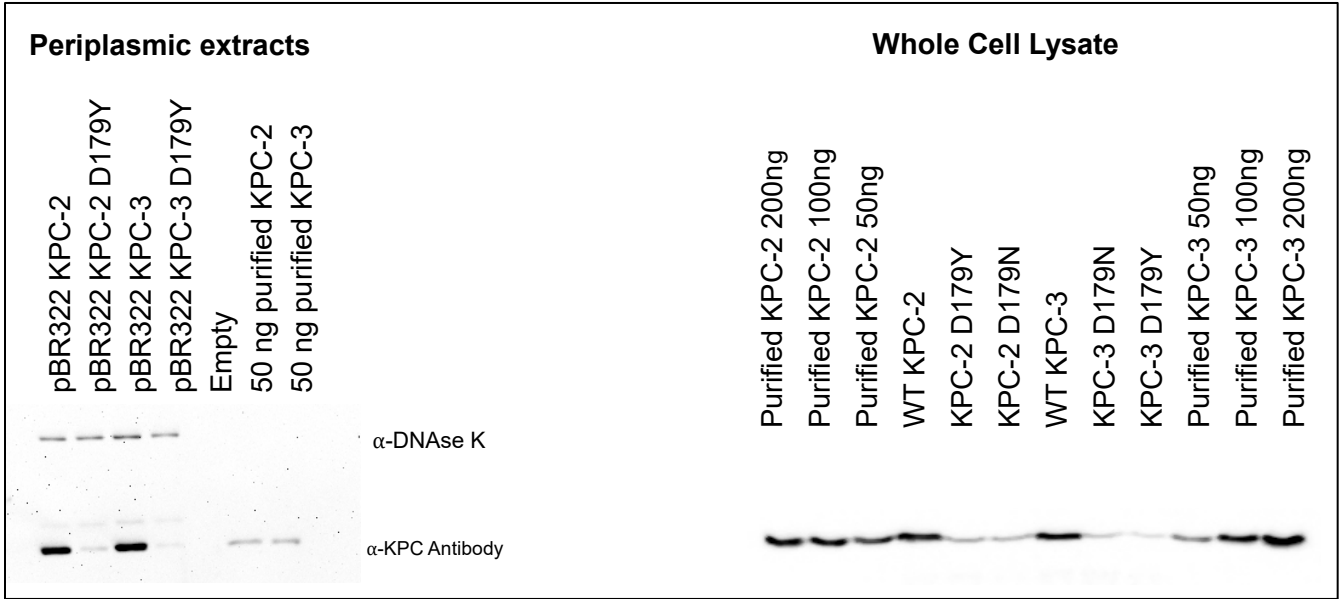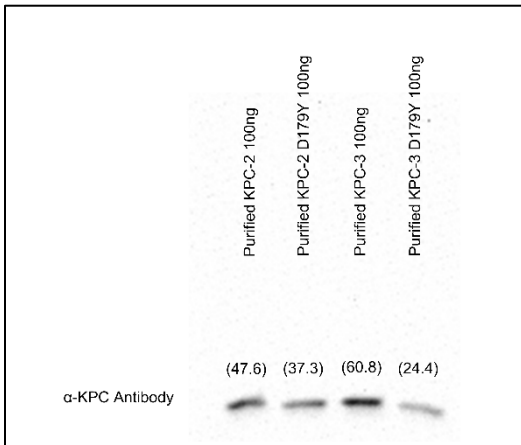

17

18 **Figure S1.** Immunoblots of periplasmic extracts, whole cell lysates, and 100 ngs each of purified KPC-2,  
 19 KPC-2 D179Y, KPC-3, and KPC-3 D179Y. ImageJ analysis of equal amounts of enzyme (100 ngs) show  
 20 varying recognition by the polyclonal anti-KPC-2 antibody (values shown in parentheses).

21

22 **a.**

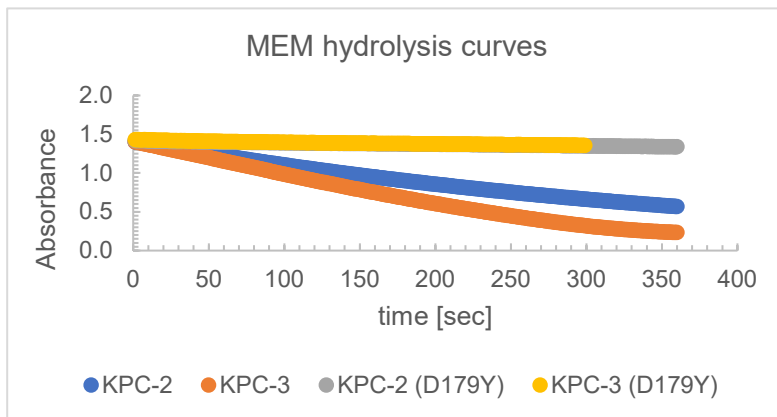

28

29 **b.**

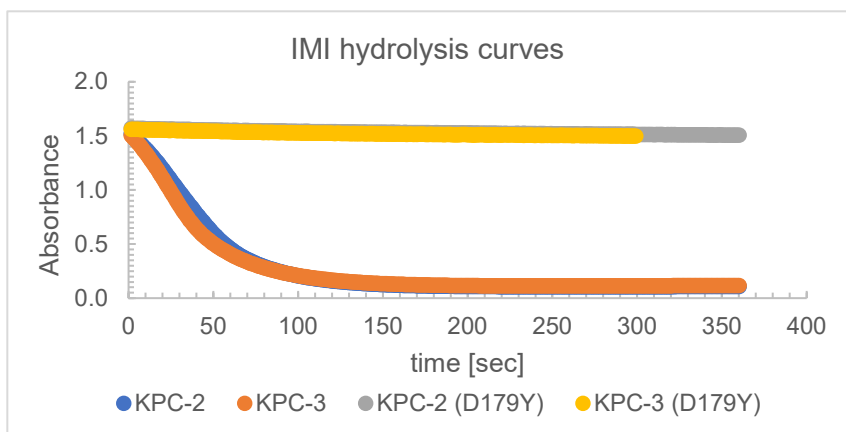

35

36 **c.**

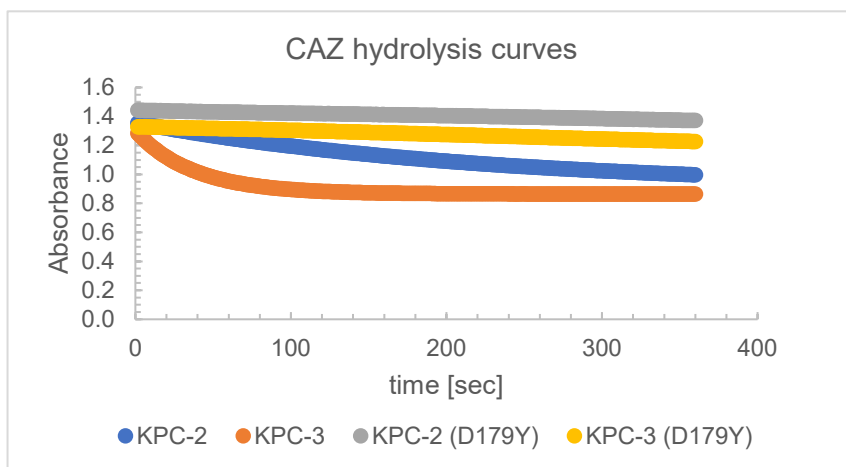

44 **Figure S2.** Steady state kinetics. (a.) MEM, (b.) IMI, and (c.) CAZ hydrolysis curves. WT KPC-2 and  
45 KPC-3 can hydrolyze MEM, IMI, and CAZ. D179Y variants showed no catalytic activity against IMI and  
46 MEM, and minimal hydrolysis against CAZ.

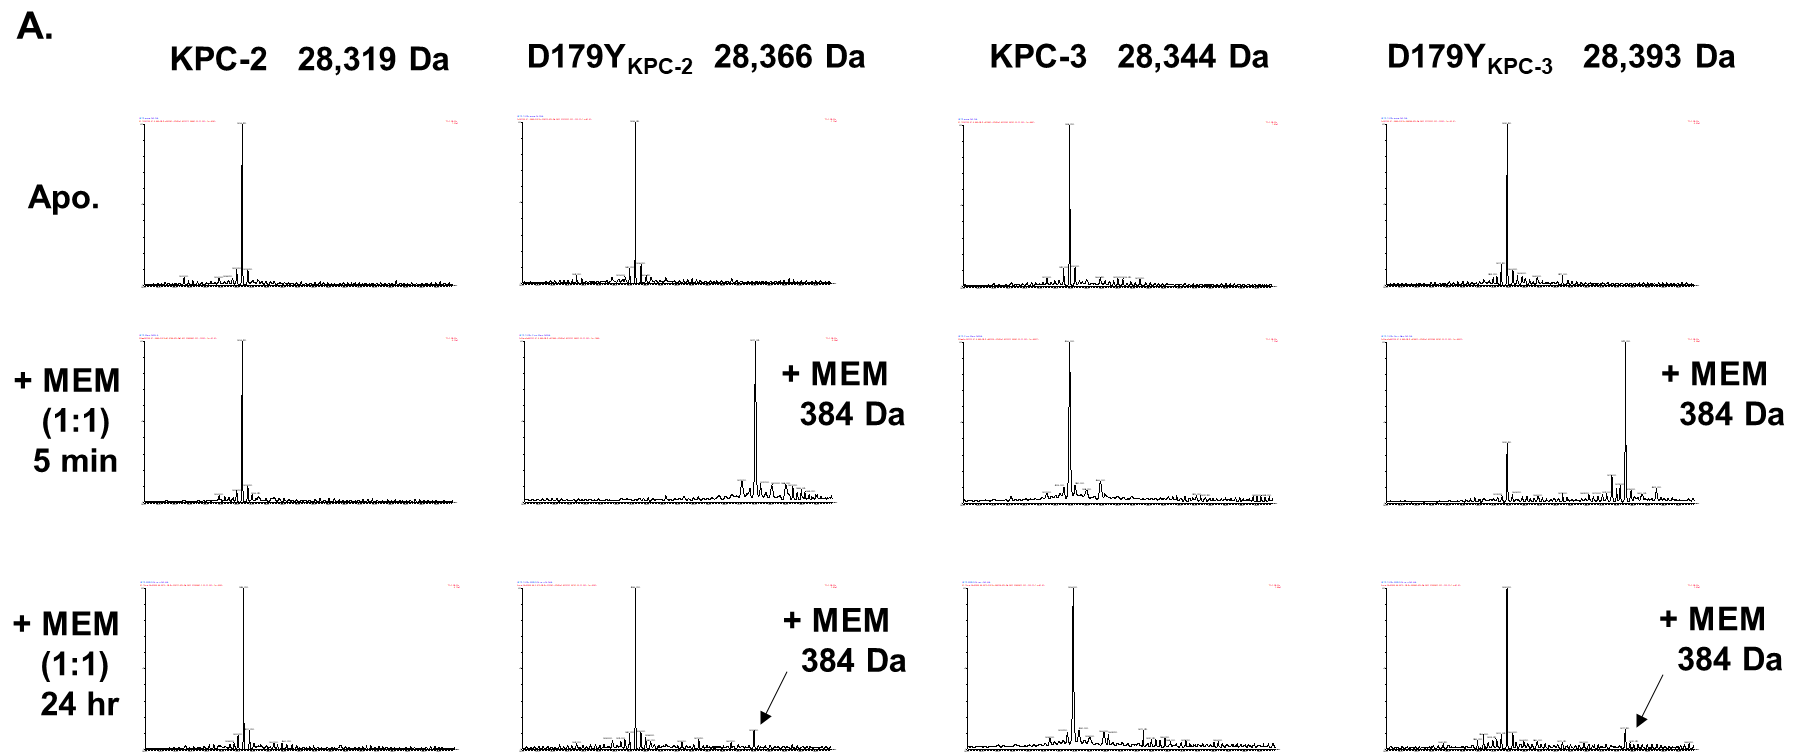

48

49

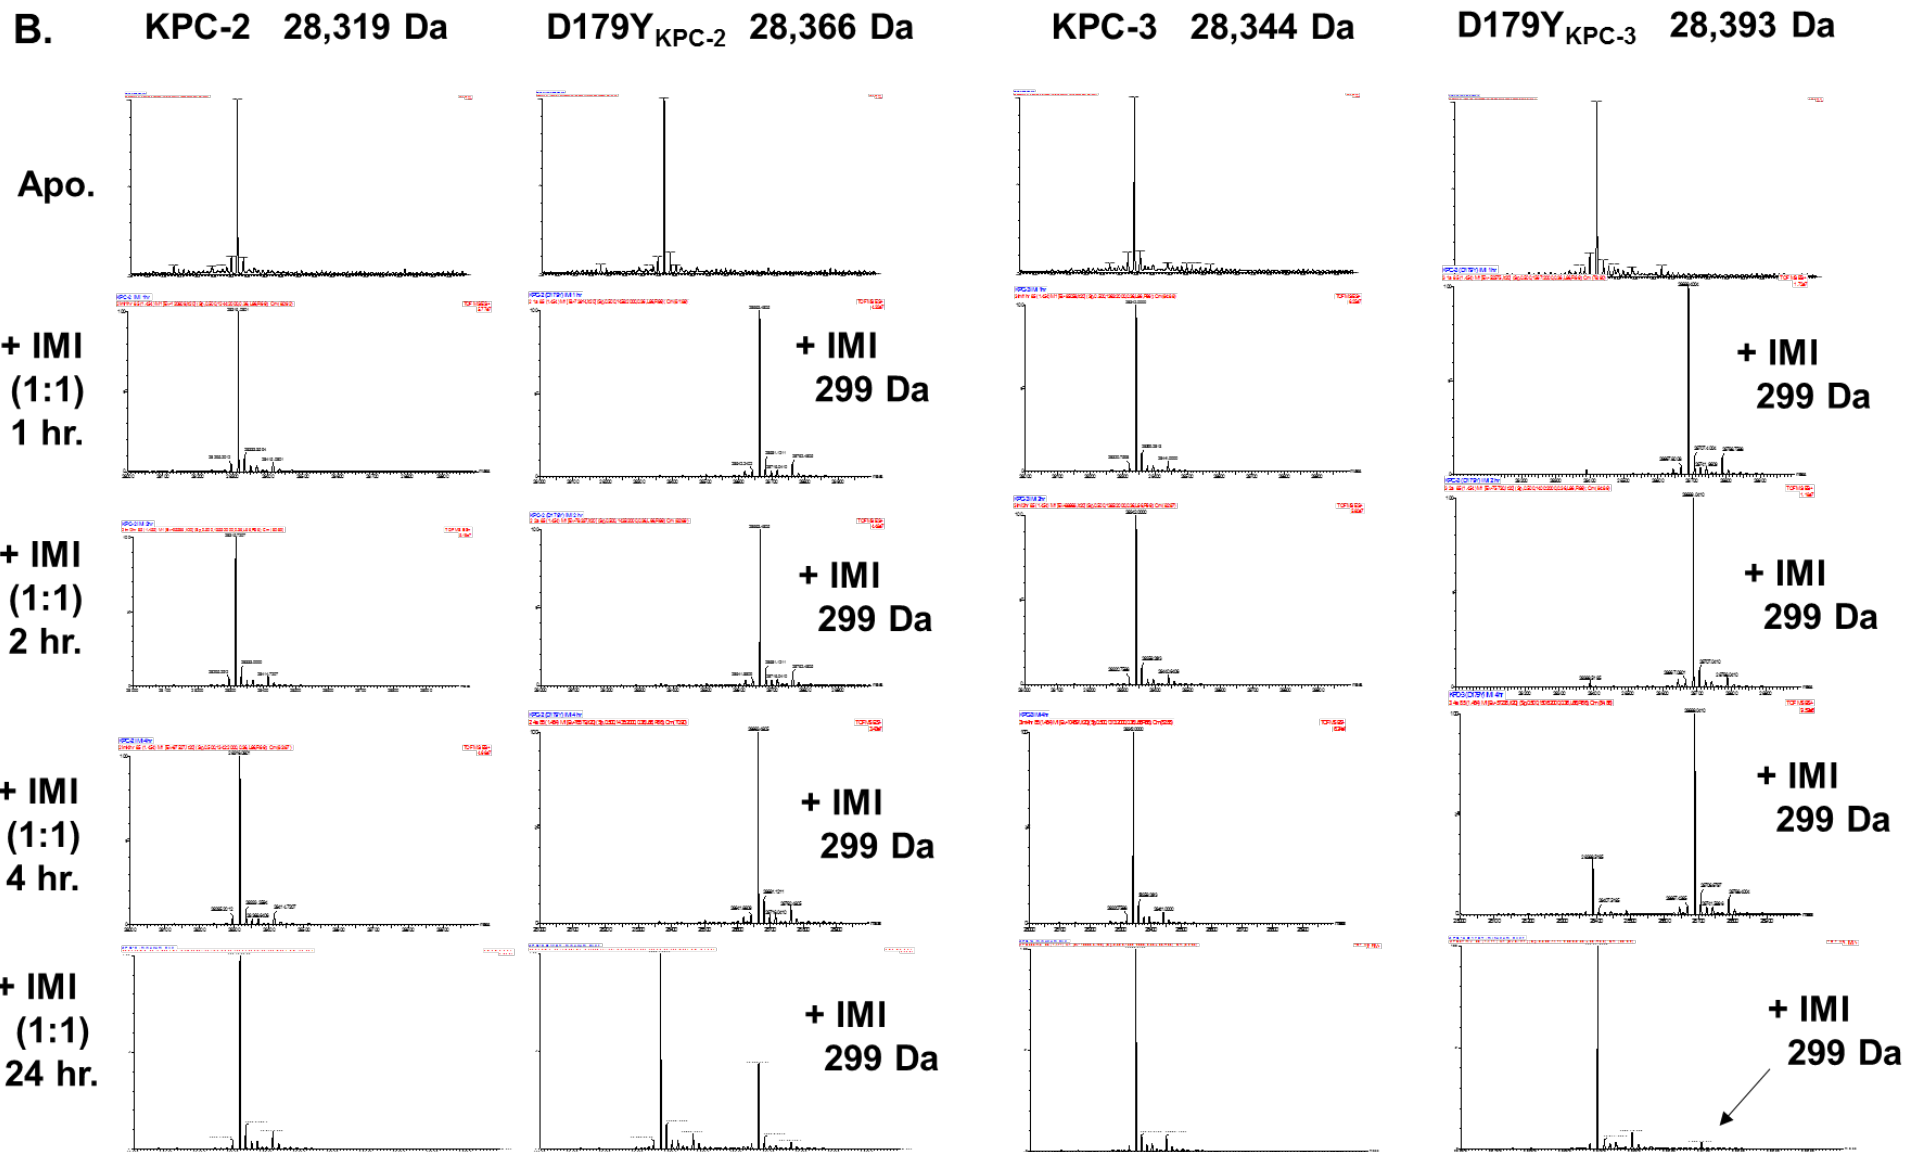

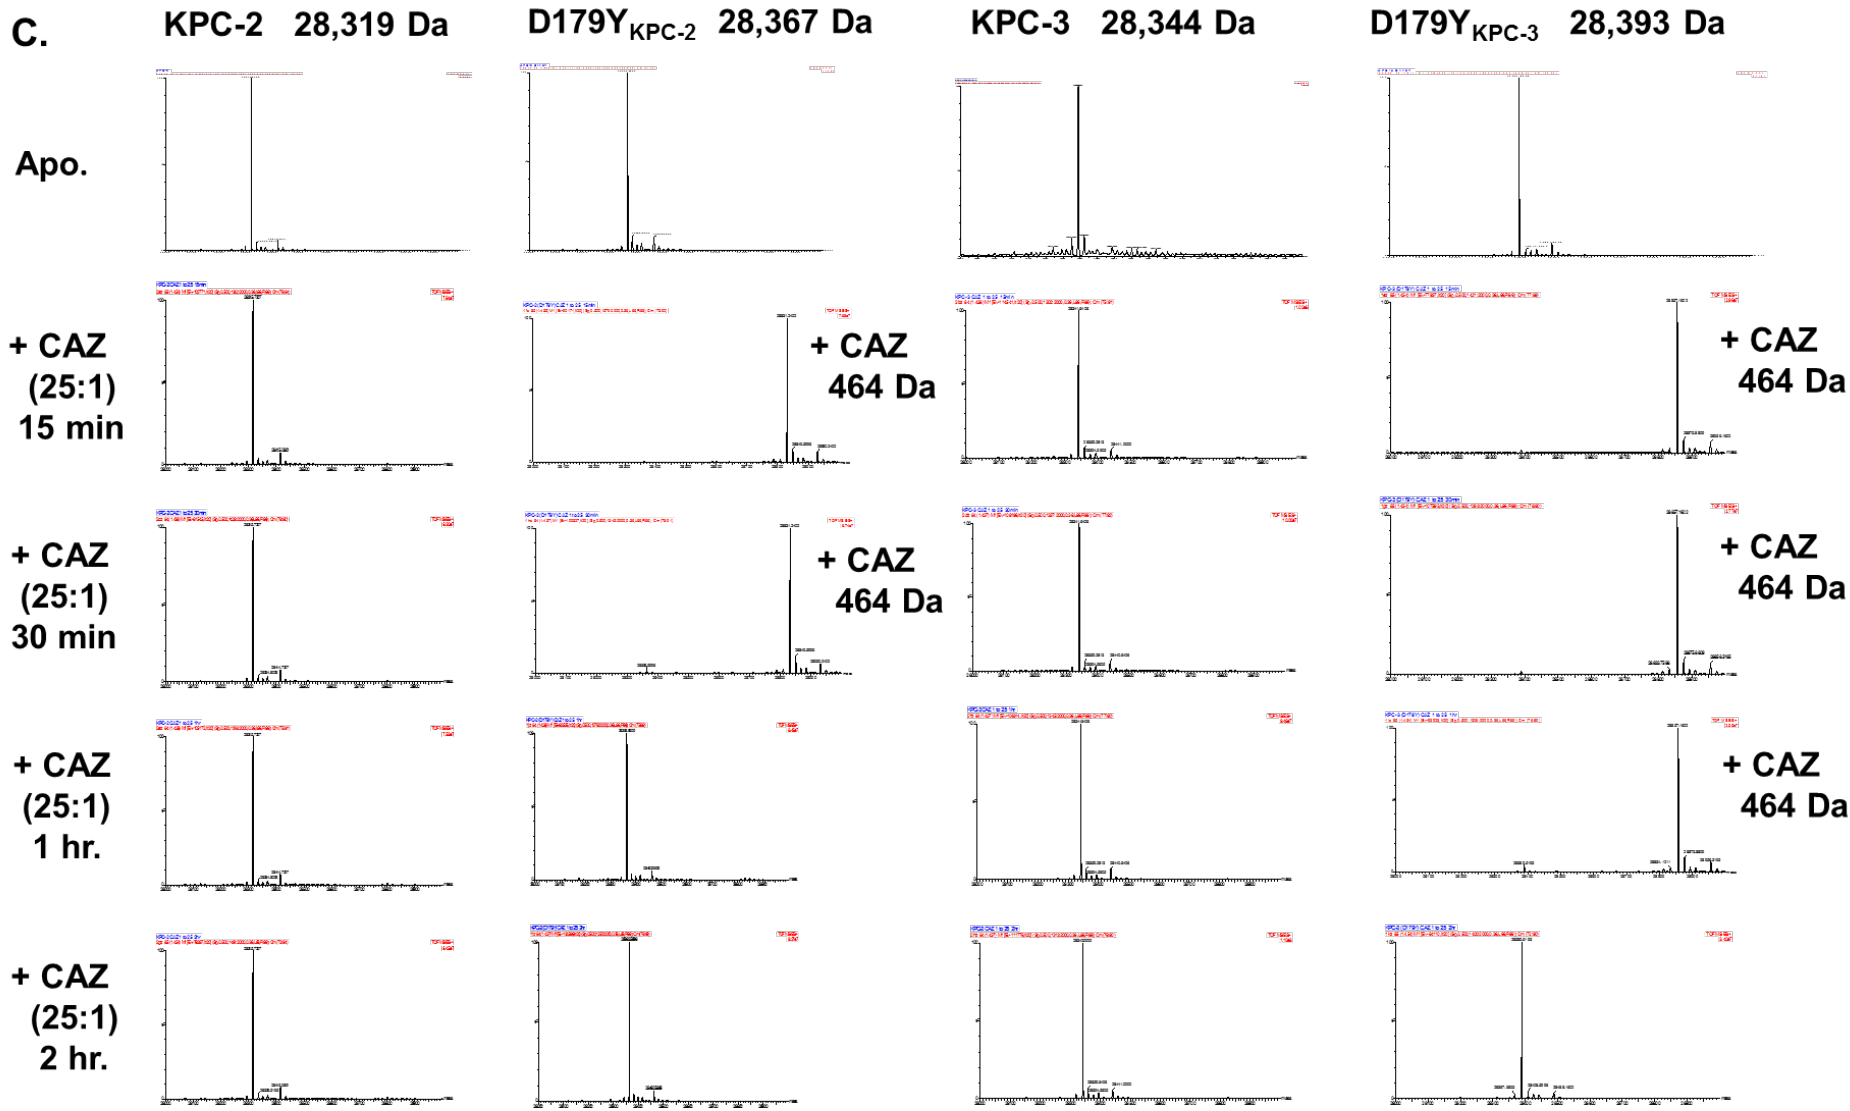

52

53

D.      **KPC-2 28,319 Da**      **D179Y<sub>KPC-2</sub> 28,366 Da**      **KPC-3 28,344 Da**      **D179Y<sub>KPC-3</sub> 28,393 Da**

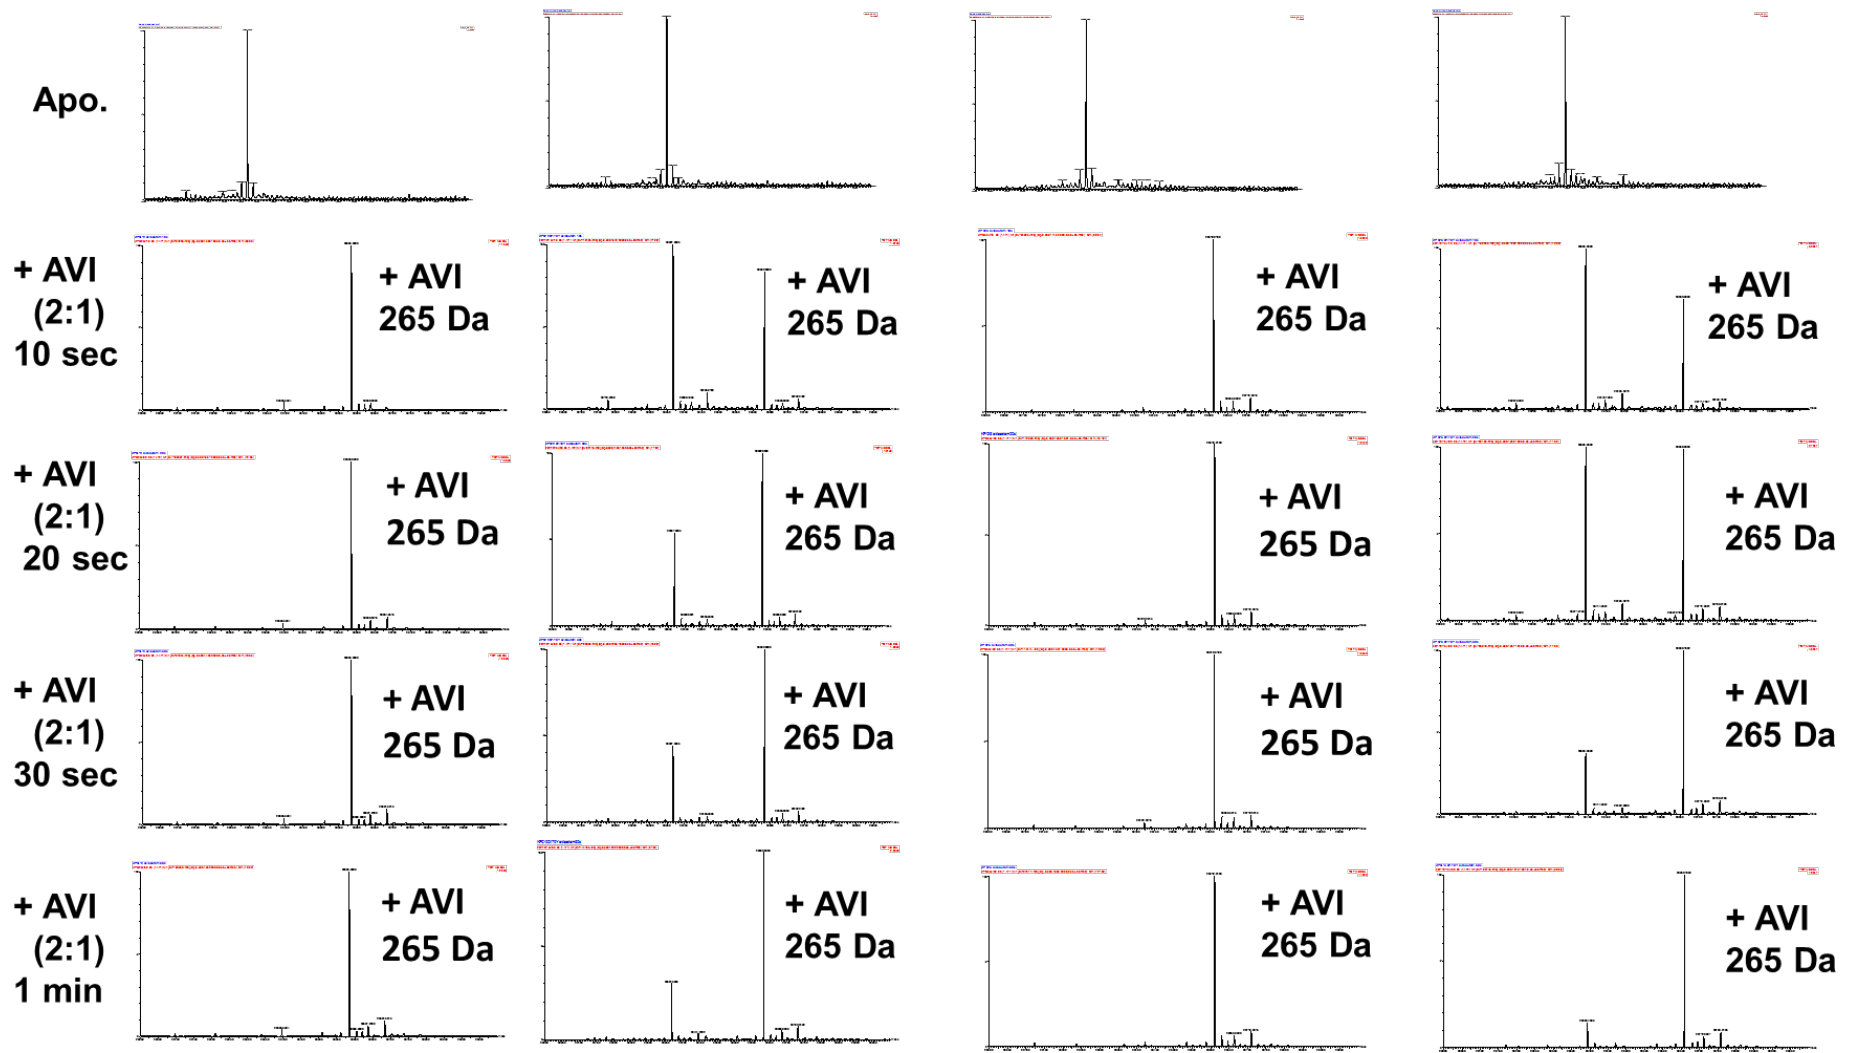

55

56

57 **Figure S3.** Timed Mass Spectrometry. Both KPC-2 and KPC-3 D179Y variants form prolonged (24h) acyl-complexes with MEM (**A**) and IMI  
58 (**B**). The prolonged trapping of MEM and IMI by wild type KPCs is not evident. However, the D179Y variants of KPC-2 and KPC-3 trap MEM  
59 and IMI similarly. D179Y variants were able to form acyl-enzyme complex with CAZ (**C**) using a 25x molar excess of CAZ to enzyme, but the  
60 acyl-enzyme complex was reduced to < 2 hours ( $bla_{KPC-2 D179Y}, k_{cat} \leq 0.014 \text{ s}^{-1}$ ;  $bla_{KPC-3 D179Y}, k_{cat} \leq 0.007 \text{ s}^{-1}$ ). KPC-2 and KPC-3 formed the acyl-  
61 enzyme with AVI immediately, in the first 10 sec of incubation, and at a ratio of 2:1. For the KPC-2 D179Y variant, the complex was formed  
62 after 1 min incubation (**D**).



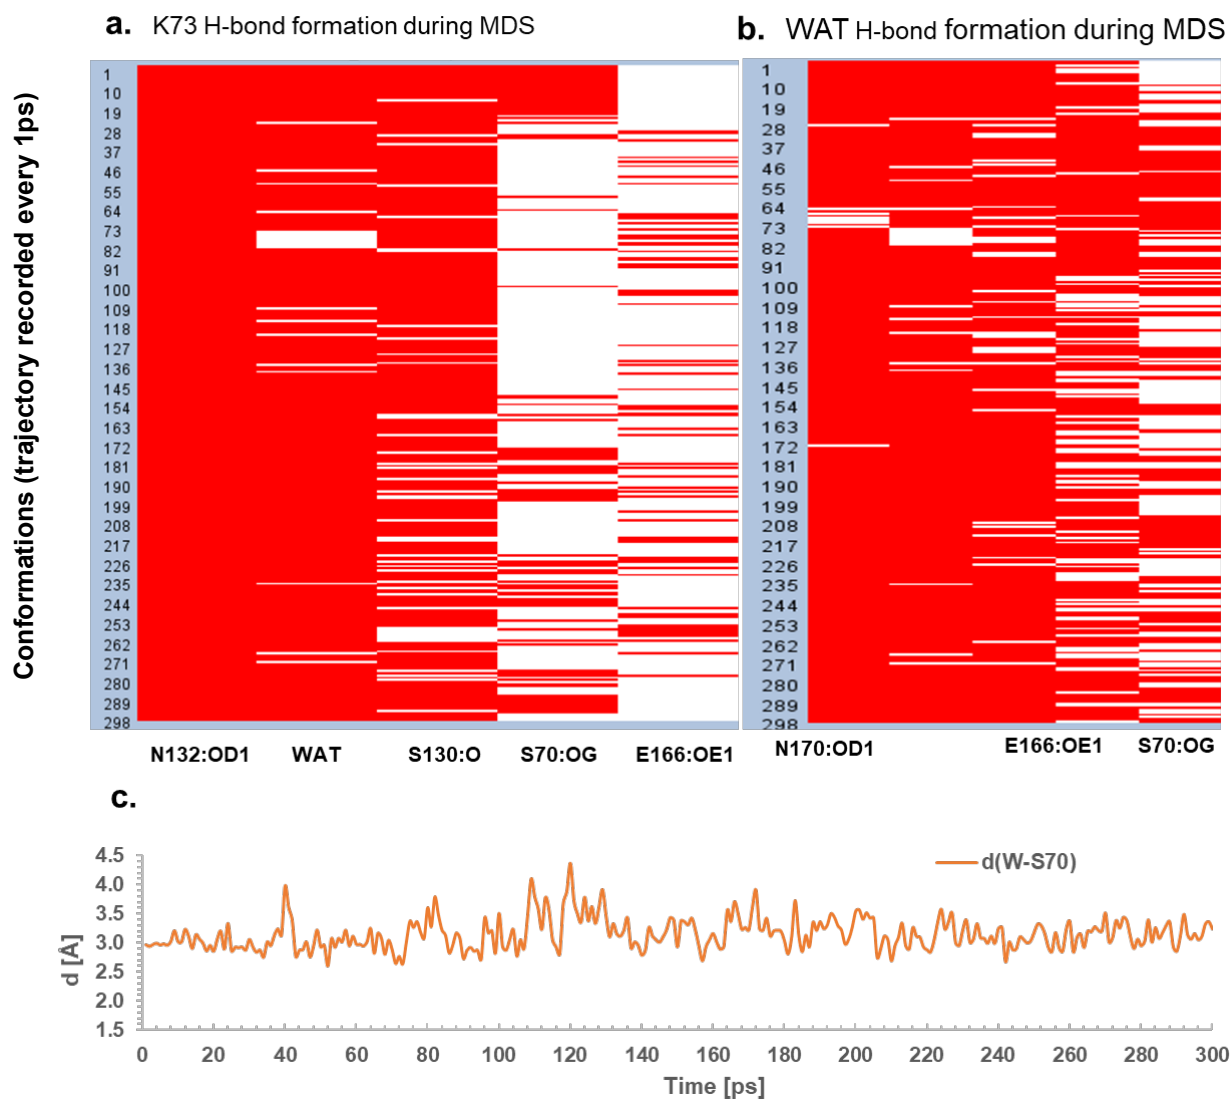

**Figure S4.** During the 300ps MDS, we follow the possible interactions and H-bond formation of K73 (**a**), and deacylation water (**b, c**). K73 residue is forming and maintaining a H-bonds network with N132:OD1, S70:O and a water molecule (**a**). The de-acylation water molecule (**b**) Preserve the H-bonds with K73, and is positioned at H-bond distance during the simulation.

72

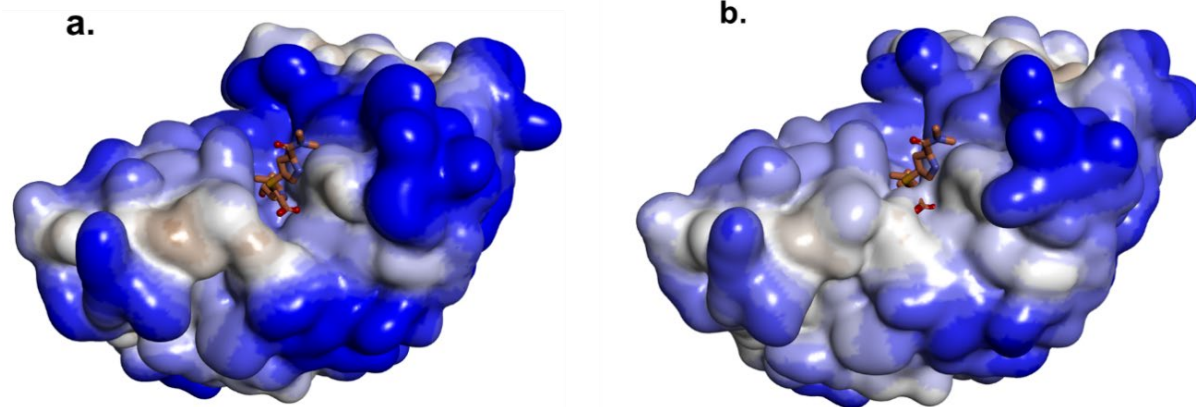

74

76 **Figure S5.** The Connolly electrostatic surface representation of KPC-2 (3) and D179Y variants with  
78 CAZ docked into the active site, shows the active site volumes and surface potential variability.

78

## Supplementary Materials and Methods

80 **MICs.** Mueller-Hinton (MH) agar-dilution MIC measurements were performed according to Clinical and  
Laboratory Standards Institute (CLSI) guidelines as previously described (1). The MICs are reported as  
82 the concentrations at which bacterial growth was no longer observed. Avibactam, relebactam, and  
vaborbactam were tested at a constant 4 µg/ml in combination with their respective antibiotic partners.  
84 All MICs were performed in triplicate.

**Immunoblotting.** Immunoblotting was used to evaluate the expression levels of wild-type KPC-2, KPC-  
86 3, and D179Y variants as previously described (2). Five-milliliter cultures of *E. coli* DH10B cells containing  
pBR322 phagemids harboring the *bla*<sub>KPC</sub> genes in Mueller-Hinton II broth containing 20 µg/mL  
88 chloramphenicol were grown at 37 °C to an optical density at 600 nm (OD<sub>600</sub>) of 0.8. Fifty-microliter  
aliquots of whole cells from these cultures were pelleted and frozen overnight. Pellets were resuspended  
90 in 20 µL of loading buffer. Whole cells were then separated via SDS-PAGE and subsequently transferred  
to a polyvinylidene difluoride (PVDF) membranes (Novex, Life Technologies, Carlsbad, CA) by  
92 electroblotting. After blocking for 1 h with 5% nonfat dry milk, the presence of KPC was detected by  
incubation in 5% nonfat dry milk with anti-KPC-2 polyclonal antibodies (1µg/ml) (3, 4) and anti-DnaK  
94 (Enzo Life Science, Farmingdale, New York) (1/10,000 dilution) overnight at 4°C. The membranes were  
washed four times, 15 min each, in Tris-buffered saline (pH 7.4) containing 0.1% Tween 20 and  
96 subsequently incubated in 5% nonfat dry milk with a 1/10,000 dilution of horseradish peroxidase (HRP)-  
protein G conjugate (Bio-Rad, Hercules, California) and 1/10,000 dilution of goat anti-mouse IgG-HRP  
98 (Santa Cruz Biotechnology, Santa Cruz, California). After four additional washes, the membranes were  
processed for exposure using the ECL kit (GE Healthcare, Chicago, Illinois) and FOTO/AnalystVR FX  
100 (Fotodyne, Hartland, Wisconsin). Additional immunoblotting was done with 100 ng each of KPC-2, KPC-  
3, KPC-2 (D179Y), and KPC-3 (D179Y). ImageJ analysis software (version 1.52, National Institutes of  
102 Health) was used to determine protein band intensities.

104 **References**

- 106 1. Clinical and Laboratory Standards Institute. 2020. M100-S30. Performance Standards for  
Antimicrobial Susceptibility Testing, 30th Edition Clinical and Laboratory Standards Institute,  
Wayne, PA.
- 108 2. Papp-Wallace KM, Taracila M, Hornick JM, Hujer AM, Hujer KM, Distler AM, Endimiani A,  
Bonomo RA. 2010. Substrate selectivity and a novel role in inhibitor discrimination by residue 237  
110 in the KPC-2 beta-lactamase. *Antimicrob Agents Chemother* 54:2867-77.
- 112 3. Barnes MD, Winkler ML, Taracila MA, Page MG, Desarbre E, Kreiswirth BN, Shields RK, Nguyen  
MH, Clancy C, Spellberg B, Papp-Wallace KM, Bonomo RA. 2017. *Klebsiella pneumoniae*  
Carbapenemase-2 (KPC-2), Substitutions at Ambler Position Asp179, and Resistance to  
114 Ceftazidime-Avibactam: Unique Antibiotic-Resistant Phenotypes Emerge from beta-Lactamase  
Protein Engineering. *mBio* 8:e00528-17.
- 116 4. Papp-Wallace KM, Taracila MA, Smith KM, Xu Y, Bonomo RA. 2012. Understanding the  
molecular determinants of substrate and inhibitor specificities in the carbapenemase KPC-2:  
118 exploring the roles of Arg220 and Glu276. *Antimicrob Agents Chemother* 56:4428-38.

120
